# Supplementary material for: Single-step synthesis of hyperbranched, luminescent Mn2+-doped ZnSe1−xSx nanocrystals using dichalcogenide precursors
Source: Royal Society of Chemistry journal article supplement (doi:10.1039/c6tc01207h), 2016-01-01
Supplement: c6tc01207h1.pdf [file c6tc01207h1.pdf]

## Supporting Information

### Single-step synthesis of hyperbranched, luminescent Mn<sup>2+</sup>-doped ZnSe<sub>1-x</sub> S<sub>x</sub> nanocrystals using dichalcogenide precursors

Mohammad S. Yazdanparast, Matthew T. Webb, and Emily J. McLaurin\*

*Department of Chemistry, 213 Chemistry and Biochemistry Building, Kansas State University, Manhattan, KS 66506 United States*

mclaurin@ksu.edu

| <i>Index</i>                                                                             | <i>Page</i> |
|------------------------------------------------------------------------------------------|-------------|
| <b>Figure S1.</b> Photoluminescence excitation spectrum of <b>1</b>                      | S2          |
| <b>Figure S2.</b> TEM images of <b>1</b>                                                 | S3          |
| <b>Figure S3.</b> TEM images of <b>2</b>                                                 | S4          |
| <b>Figure S4.</b> TEM images of <b>3a</b>                                                | S5          |
| <b>Figure S5.</b> TEM images of <b>3b</b>                                                | S6          |
| <b>Figure S6.</b> TEM images of <b>4</b>                                                 | S7          |
| <b>Figure S7.</b> TEM images of <b>5</b>                                                 | S8          |
| <b>Figure S8.</b> TEM images of <b>1</b> prepared with other Mn <sup>2+</sup> precursors | S9          |

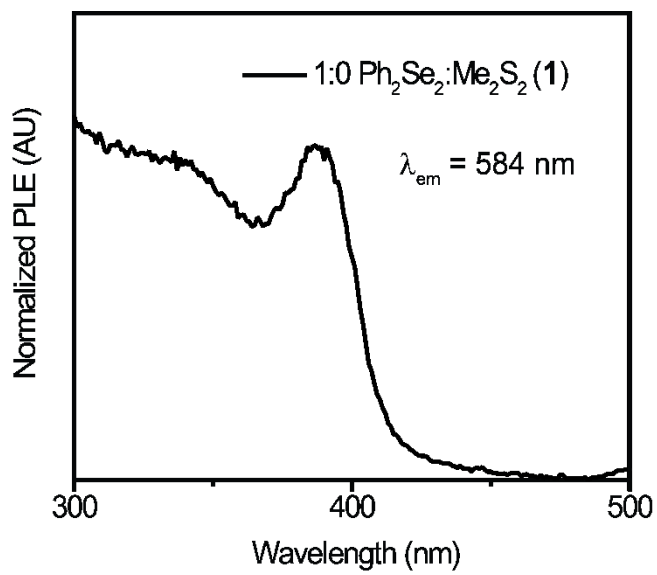

**Figure S1.**

Photoluminescence excitation spectrum of Mn<sup>2+</sup>:ZnSe synthesized with Ph<sub>2</sub>Se<sub>2</sub>. The emission was detected at 584 nm while scanning excitation wavelengths from 300-500 nm. The PLE spectrum exhibits the characteristic NC first excitonic feature near 390 nm along with a continuous increase in intensity at higher energies.

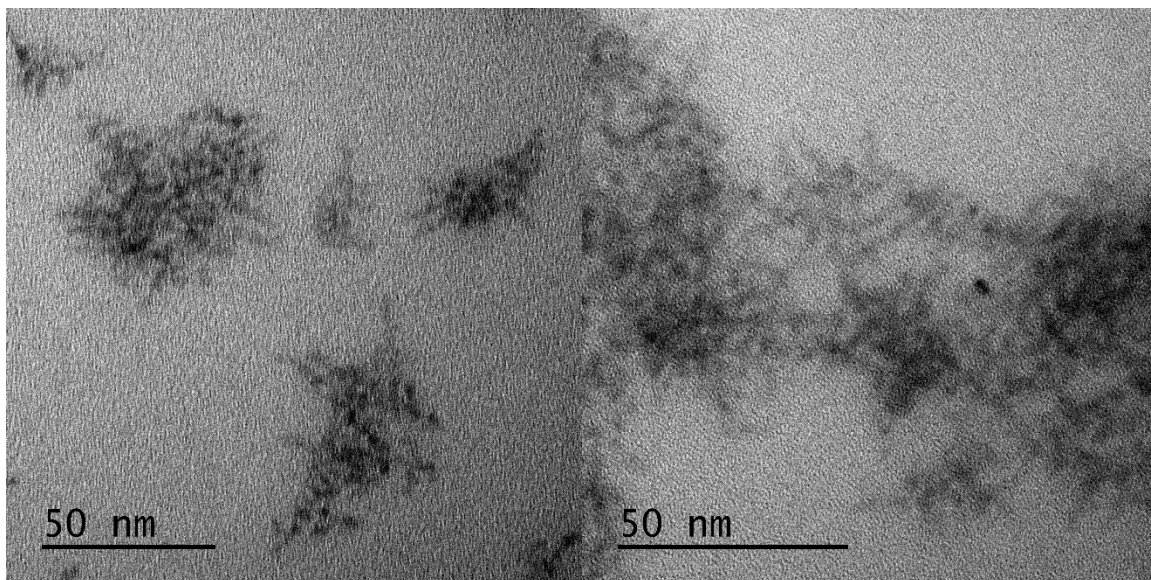

**Figure S2.**  
TEM images of **1**. Additional images of the NCs demonstrating branching patterns.

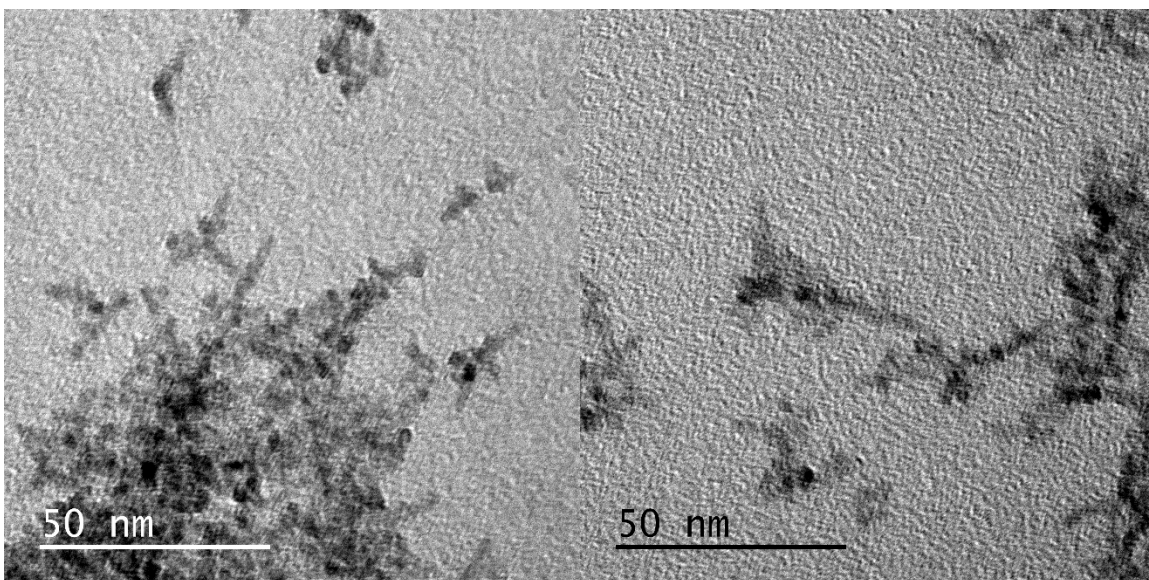

**Figure S3.**  
TEM images of **2**. Additional images of the NCs demonstrating branching patterns.

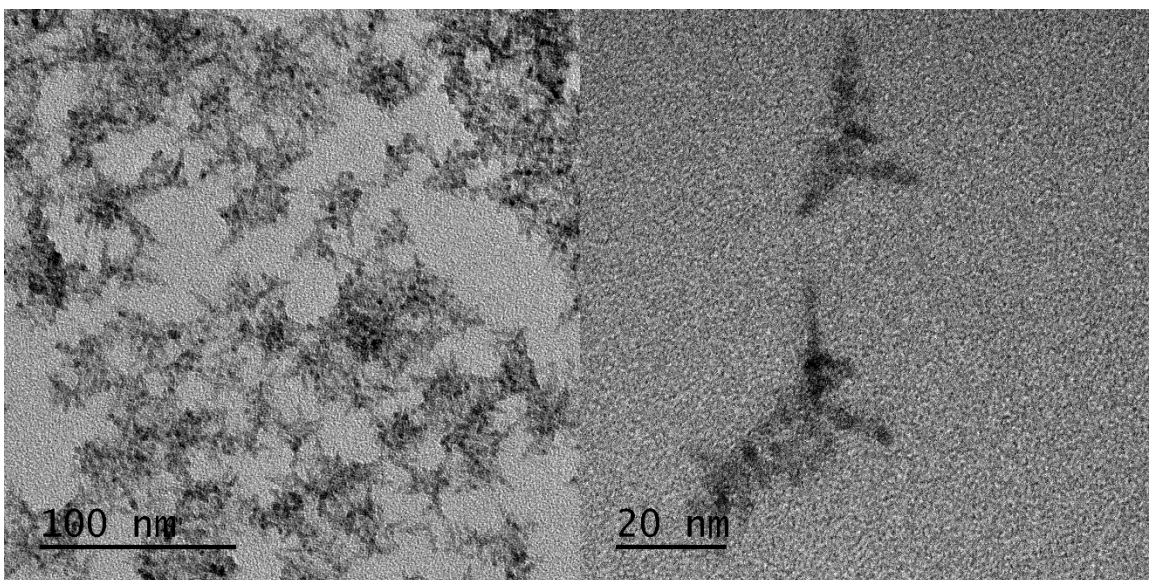

**Figure S4.**  
TEM images of **3a**. Additional images of the NCs demonstrating branching patterns.

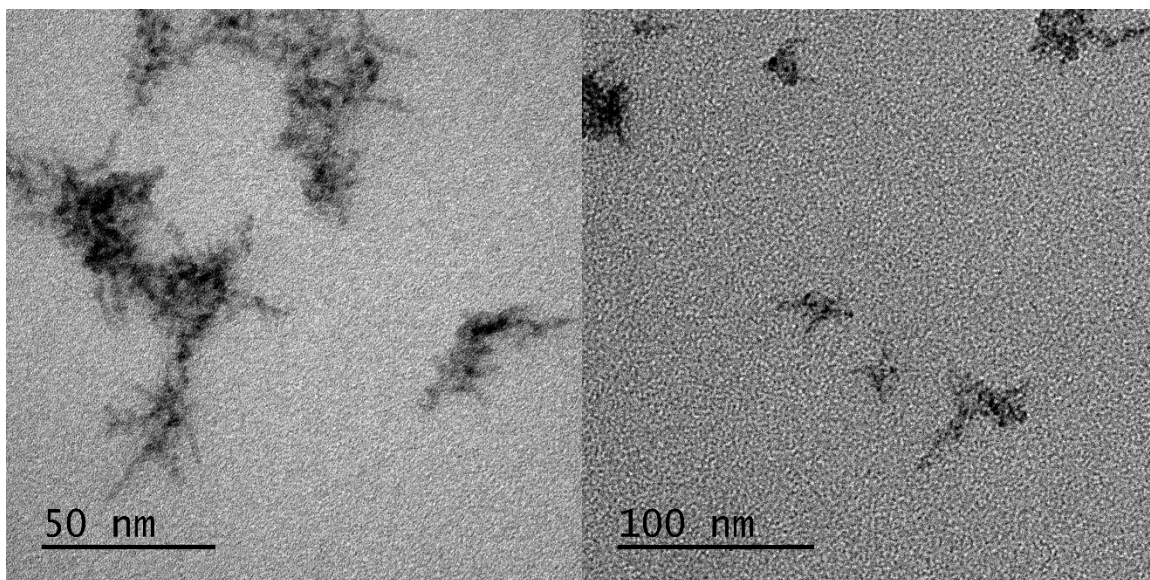

**Figure S5.**  
TEM images of **3b**. Additional images of the NCs demonstrating branching patterns.

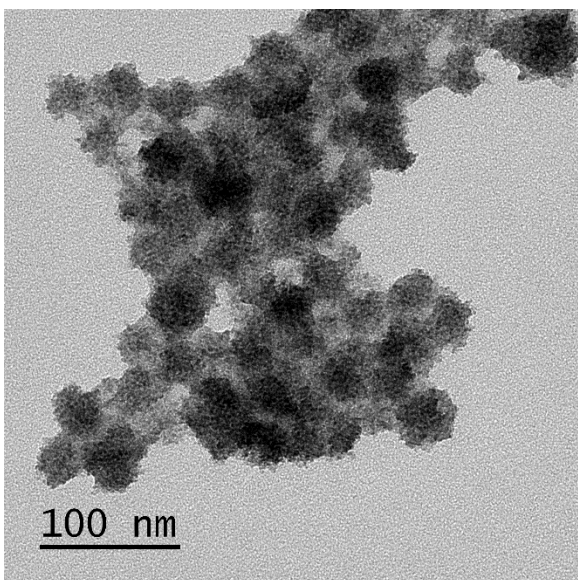

**Figure S6.**  
TEM image of **4**. Additional images of the NCs demonstrating aggregation.

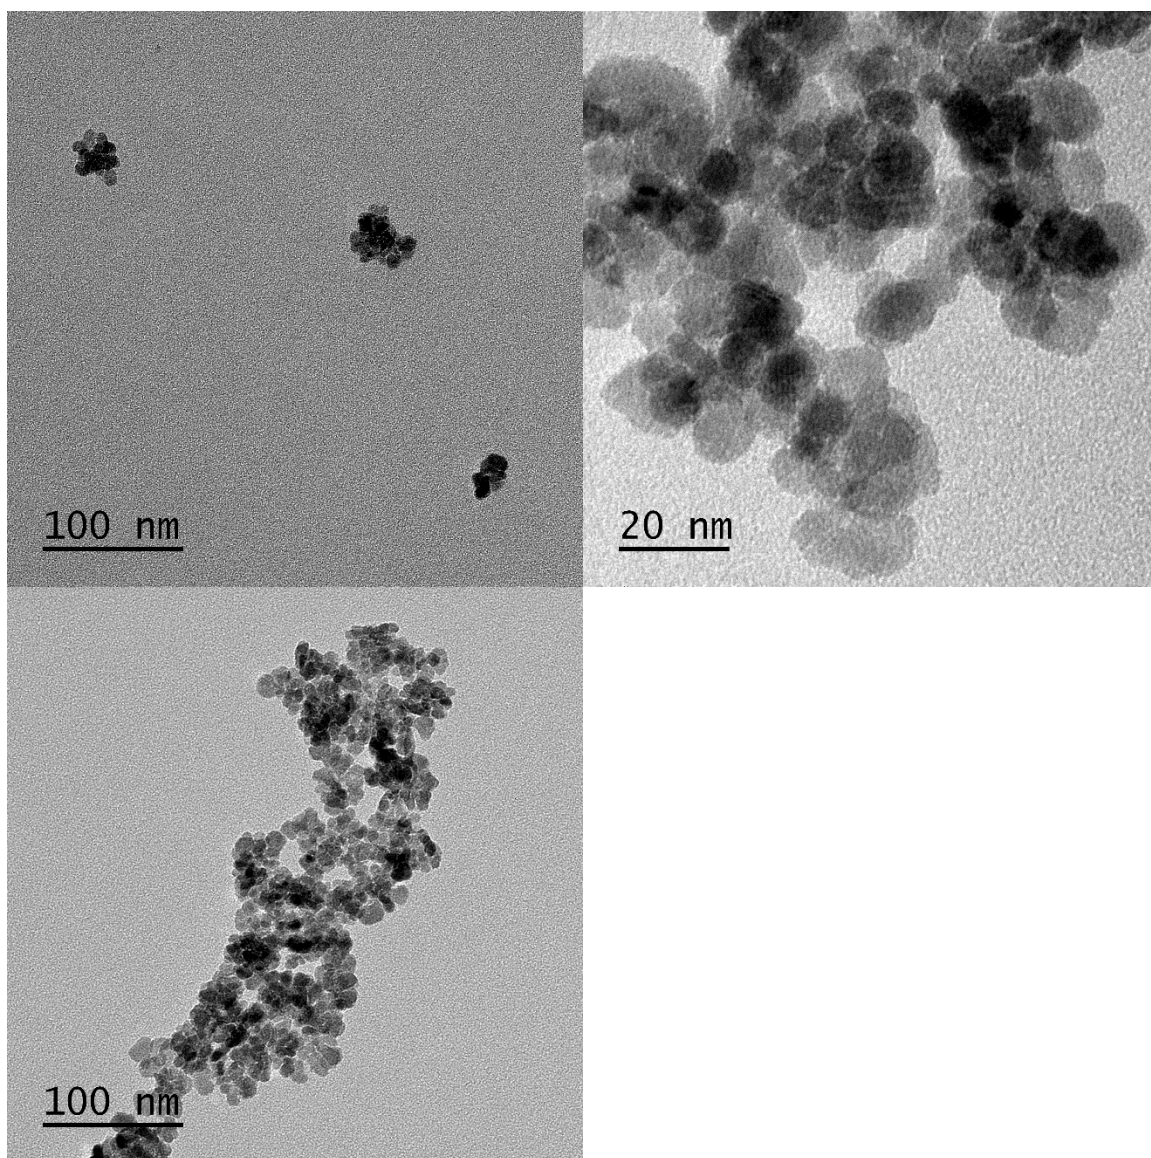

**Figure S7.**

TEM images of **5**. Additional images of the NCs demonstrating aggregation and formation of larger and smaller assemblies.



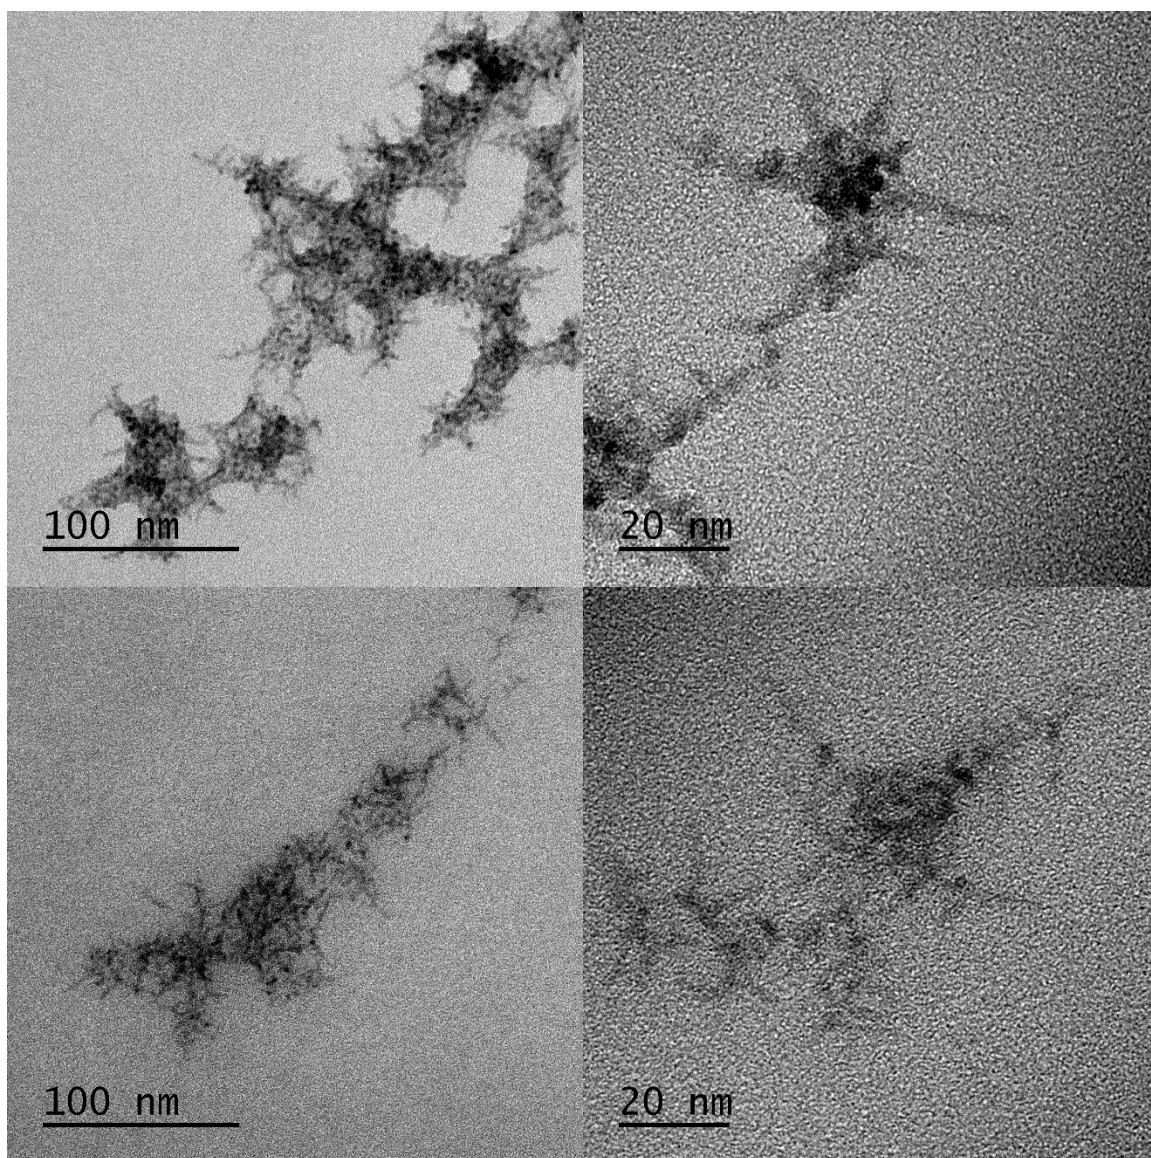

**Figure S8.**  
TEM images of **1** prepared using  $\text{MnCl}_2 \cdot 4\text{H}_2\text{O}$  (top) and  $\text{Mn}(\text{OAc})_2 \cdot 4\text{H}_2\text{O}$  (bottom).
